# Supplementary material
Source: PubMed Central journal article supplement (PMC7680620)
Supplement: mmc1.pdf [file mmc1.pdf]

## Appendix 1

|               | Intervention point: March 16<br>(main analyses) |                      | Intervention point: March 2<br>(post-hoc analyses) |               | Intervention point: February 17<br>(post-hoc analyses) |                      | Intervention point: February 3<br>(post-hoc analyses) |               |
|---------------|-------------------------------------------------|----------------------|----------------------------------------------------|---------------|--------------------------------------------------------|----------------------|-------------------------------------------------------|---------------|
| Site          | Effect**<br>( $\mu\text{g}/\text{m}^3$ )        | 95% CI               | Effect<br>( $\mu\text{g}/\text{m}^3$ )             | 95% CI        | Effect<br>( $\mu\text{g}/\text{m}^3$ )                 | 95% CI               | Effect<br>( $\mu\text{g}/\text{m}^3$ )                | 95% CI        |
| cITS approach |                                                 |                      |                                                    |               |                                                        |                      |                                                       |               |
| LAN           | -9.34                                           | -23.58; 4.90         | -3.95                                              | -21.22; 13.33 | -14.30                                                 | -32.26; 3.66         | 1.60                                                  | -16.11; 19.30 |
| STA           | <b>-10.02</b>                                   | <b>-19.25; -0.79</b> | -4.58                                              | -16.29; 7.12  | -12.07                                                 | -24.20; 0.06         | -0.56                                                 | -12.75; 11.63 |
| LOT           | -1.94                                           | -11.90; 8.03         | -1.94                                              | -15.24; 11.37 | -13.63                                                 | -27.88; 0.63         | -4.11                                                 | -18.28; 10.06 |
| ALL           | -1.37                                           | -12.77; 10.02        | 1.23                                               | -13.58; 16.03 | -8.66                                                  | -24.27; 6.96         | -7.73                                                 | -22.77; 7.32  |
| JOH           | 0.75                                            | -8.79; 10.29         | -3.60                                              | -16.24; 9.04  | -12.19                                                 | -25.60; 1.22         | -6.17                                                 | -19.57; 7.24  |
| SC approach   |                                                 |                      |                                                    |               |                                                        |                      |                                                       |               |
| LAN           | <b>-15.65</b>                                   | <b>-27.58; -4.09</b> | -6.55                                              | -36.32; 13.79 | -19.95                                                 | -47.37; 2.32         | -9.92                                                 | -29.27; 10.25 |
| STA           | <b>-15.1</b>                                    | <b>-24.82; -9.83</b> | -6.43                                              | -25.86; 7.07  | <b>-13.49</b>                                          | <b>-32.20; -0.96</b> | -8.39                                                 | -21.49; 4.69  |
| LOT           | <b>-8.84</b>                                    | <b>-20.04; -2.51</b> | -4.29                                              | -24.92; 5.76  | -15.14                                                 | -37.33; 1.21         | -10.21                                                | -23.56; 4.37  |
| ALL           | -3.08                                           | -12.59; 5.39         | -2.74                                              | -16.35; 12.90 | -12.79                                                 | -29.60; 5.34         | -6.13                                                 | -24.76; 11.07 |
| JOH           | -4.69                                           | -11.65; 1.86         | -5.43                                              | -24.67; 5.47  | <b>-13.99</b>                                          | <b>-32.59; -0.88</b> | -9.33                                                 | -24.84; 5.41  |

Appendix Table 1: Summary of results from main (as reported in the main study – here for reference) and post hoc analyses assessing backdated intervention points.

**Bold:** denotes statistical significance at an alpha level of 5%.

\*Effects are expressed as the effect over the post-intervention time period, e.g. -9.34 corresponds to a reduction in  $\text{NO}_2$  concentration of  $9.34 \mu\text{g}/\text{m}^3$  between the pre- and post-intervention periods in 2020 relative to the control year(s).

|               | 4-week post-intervention (main analyses) |                      | Smoothed data (post hoc analyses) |                      | Shortened pre-intervention period (post hoc analyses) |                      |
|---------------|------------------------------------------|----------------------|-----------------------------------|----------------------|-------------------------------------------------------|----------------------|
| Site          | Effect* (µg/m <sup>3</sup> )             | 95% CI               | Effect (µg/m <sup>3</sup> )       | 95% CI               | Effect (µg/m <sup>3</sup> )                           | 95% CI               |
| cITS approach |                                          |                      |                                   |                      |                                                       |                      |
| LAN           | -9.34                                    | -23.58; 4.90         | -6.26                             | -20.19; 7.66         | -4.75                                                 | -18.51; 9.00         |
| STA           | <b>-10.02</b>                            | <b>-19.25; -0.79</b> | -8.33                             | -17.33; 0.67         | -5.53                                                 | -13.89; 2.82         |
| LOT           | -1.94                                    | -11.90; 8.03         | 0.33                              | -9.31; 9.98          | 3.52                                                  | -5.17; 12.20         |
| ALL           | -1.37                                    | -12.77; 10.02        | 0.33                              | -10.77; 11.43        | 5.29                                                  | -3.97; 14.54         |
| JOH           | 0.75                                     | -8.79; 10.29         | 2.51                              | -6.90; 11.91         | 6.74                                                  | -1.32; 14.79         |
| SC approach   |                                          |                      |                                   |                      |                                                       |                      |
| LAN           | <b>-15.65</b>                            | <b>-27.58; -4.09</b> | -10.02                            | -25.94; 2.82         | -9.89                                                 | -21.78; 1.71         |
| STA           | <b>-15.1</b>                             | <b>-24.82; -9.83</b> | <b>-9.37</b>                      | <b>-25.59; -3.79</b> | <b>-9.83</b>                                          | <b>-17.14; -4.69</b> |
| LOT           | <b>-8.84</b>                             | <b>-20.04; -2.51</b> | -3.46                             | -15.02; 10.98        | -4.76                                                 | -13.55; 0.64         |
| ALL           | -3.08                                    | -12.59; 5.39         | 2.96                              | -6.79; 2.96          | -0.08                                                 | -7.48; 8.47          |
| JOH           | -4.69                                    | -11.65; 1.86         | 0.69                              | -30.07; 15.90        | -0.93                                                 | -8.53; 5.13          |

Appendix Table 2: Summary of results from main (as reported in the main study – here for reference) and post hoc analyses assessing smoothed NO<sub>2</sub> data and a shortened pre-intervention period.

**Bold:** denotes statistical significance at an alpha level of 5%.

\*Effects are expressed as the effect over the post-intervention time period, e.g. -9.34 corresponds to a reduction in NO<sub>2</sub> concentration of 9.34 µg/m<sup>3</sup> between the pre- and post-intervention periods in 2020 relative to the control year(s).

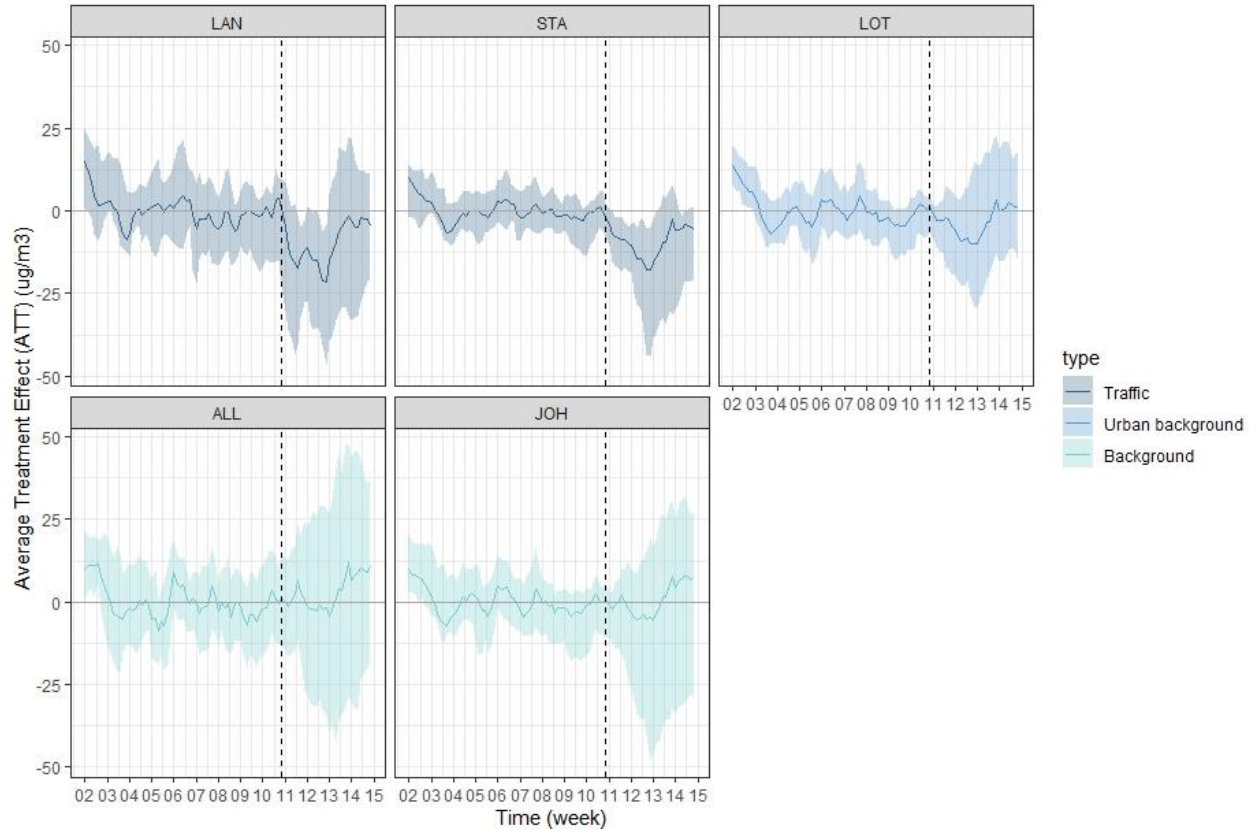

Appendix Figure 1: Difference between the observed NO<sub>2</sub> concentrations in 2020 and those from the SC counterfactual (based on the years 2014-2019) at all investigated sites using smoothed NO<sub>2</sub> data.
